# Supplementary material for: CHK1 Inhibition in Small-Cell Lung Cancer Produces Single-Agent Activity in Biomarker-Defined Disease Subsets and Combination Activity with Cisplatin or Olaparib
Source: Oxford University Press journal article supplement (doi:10.1158/0008-5472.can-16-3409), 2017-05-10
Supplement: 00085472can163409-sup-176062_2_unknown_upload_4010164_kp5d2h.doc [file 00085472can163409-sup-176062_2_unknown_upload_4010164_kp5d2h.doc]

**Title: CHK1 inhibition in small cell lung cancer produces single-agent activity in biomarker-defined disease subsets and combination activity with cisplatin or olaparib**

**Authors:** Triparna Sen1, Pan Tong2, C. Allison Stewart1, Sandra Cristea3,4, Aly Valliani1, David S. Shames5, Abena B. Redwood6, You Hong Fan1, Lerong Li2, Bonnie S. Glisson1,John D. Minna7,Julien Sage3,4, Don L. Gibbons1,8, Helen Piwnica-Worms6, John V. Heymach1,9, Jing Wang2, and Lauren Averett Byers1*

**Affiliations:** 1Departments of 1Thoracic/Head and Neck Medical Oncology, 2Bioinformatics and Computational Biology, 6Experimental Radiation Oncology, 8Molecular and Cellular Oncology and 9Cancer Biology, The University of Texas MD Anderson Cancer Center, Houston, TX 77030, USA. Departments of 3Pediatrics and 4Genetics, Stanford University, Stanford, CA 94305, USA; 5Department of Oncology Biomarker Development, Genentech Inc., South San Francisco, CA 94080, USA; 7Hamon Center for Therapeutic Oncology Research, The University of Texas Southwestern, Dallas, TX 75390, USA

*To whom correspondence should be addressed: [lbyers@mdanderson.org](mailto:lbyers@mdanderson.org)

Table S1: The genotypic status of human SCLC cell lines and their sensitivity to LY2606368

| **Cell Line** | **IC50 of LY2606368 (uM)** | ***MYCL* Copy Number (qPCR)** | ***cMYC* Copy Number (qPCR)** | ***MYCN* Copy Number (qPCR)** | **TP53 Mutation** | ***RB1***  **Status**  **(qPCR)** |
| --- | --- | --- | --- | --- | --- | --- |
| **H146** | 0.020 | No Amp | No Amp | No Amp | Yes | loss |
| **H446** | 0.027 | No Amp | Amp | No Amp | Yes | loss |
| **H524** | 0.035 | No Amp | Amp | No Amp | Yes | loss |
| **H2107** | 0.036 | Amp | No Amp | No Amp | Yes | loss |
| **H209** | 0.038 | No Amp | No Amp | No Amp | Yes | loss |
| **H847** | 0.039 | No Amp | Amp | No Amp | Yes | - |
| **H1238** | 0.043 | No Amp | No Amp | No Amp | Yes | - |
| **H378** | 0.060 | Amp | No Amp | No Amp | Yes | WT |
| **H1672** | 0.067 | No Amp | No Amp | No Amp | Yes | WT |
| **H1836** | 0.070 | Amp | No Amp | No Amp | - | - |
| **H1618** | 0.070 | - | - | - | Yes | loss |
| **H1417** | 0.070 | No Amp | No Amp | No Amp | Yes | loss |
| **H345** | 0.074 | No Amp | No Amp | No Amp | Yes | WT |
| **H1694** | 0.080 | Amp | No Amp | No Amp | Yes | WT |
| **H510** | 0.080 | Amp | No Amp | No Amp | Yes | - |
| **DMS53** | 0.086 | - | - | - | Yes | WT |
| **H187** | 0.096 | No Amp | No Amp | No Amp | Yes | WT |
| **H2227** | 0.106 | No Amp | No Amp | No Amp | Yes | loss |
| **H865** | 0.120 | No Amp | No Amp | No Amp | Yes | - |
| **H1092** | 0.143 | No Amp | No Amp | No Amp | Yes | WT |
| **H719** | 0.145 | No Amp | No Amp | No Amp | Yes | loss |
| **H748** | 0.146 | No Amp | No Amp | No Amp | Yes | loss |
| **H526** | 0.209 | No Amp | No Amp | Amp | Yes | loss |
| **H82** | 0.221 | No Amp | Amp | No Amp | Yes | loss |
| **H1930** | 0.384 | No Amp | No Amp | No Amp | Yes | WT |
| **H69** | 0.587 | No Amp | No Amp | Amp | Yes | loss |
| **H2171** | 0.631 | No Amp | Amp | No Amp | Yes | loss |
| **DMS79** | 0.878 | No Amp | No Amp | No Amp | Yes | loss |
| **DMS153** | 1 | - | - | - | Yes | loss |
| **H889** | 1 | Amp | No Amp | No Amp | Yes | WT |
| **DMS114** | 1 | - | - | - | Yes | WT |
| **H2029** | 1 | No Amp | No Amp | No Amp | Yes | loss |
| **H841** | 1 | No Amp | No Amp | No Amp | Yes | - |
| **H660** | 1 | No Amp | No Amp | No Amp | - | - |
| **H2330** | 1 | No Amp | No Amp | No Amp | - | - |

- Denotes data not available

Amp = Amplification; WT= wild type

**Table S2: Pairwise p-value of the syngeneic SCLC *in vivo* survival data of Figure 3**

| **Treatment Group 1** | **Treatment group 2** | **Pairwise p value** |
| --- | --- | --- |
| Vehicle | Cisplatin (4mg/kg, IP, 1/7) | **0.0027** |
| Vehicle | LY2606368 (10mg/kg, BID, 3/7) | **1.3×10-5** |
| Vehicle | LY2606368 (16mg/kg, BID, 1/7) | **1.3×10-5** |
| Vehicle | Cisplatin (4mg/kg, IP, 1/7)+ LY2606368 (16mg/kg, BID, 1/7) | **1.3×10-5** |
| Cisplatin (4mg/kg, IP, 1/7) | LY2606368 (10mg/kg, BID, 3/7) | **5.2×10-5** |
| Cisplatin (4mg/kg, IP, 1/7) | LY2606368 (16mg/kg, BID, 1/7) | **5.2×10-5** |
| Cisplatin (4mg/kg, IP, 1/7) | Cisplatin (4mg/kg, IP, 1/7)+ LY2606368 (16mg/kg, BID, 1/7) | **5.2×10-5** |
| LY2606368 (10mg/kg, BID, 3/7) | LY2606368 (16mg/kg, BID, 1/7) | **0.00043** |
| LY2606368 (10mg/kg, BID, 3/7) | Cisplatin (4mg/kg, IP, 1/7)+ LY2606368 (16mg/kg, BID, 1/7) | **0.00082** |
| LY2606368 (16mg/kg, BID, 1/7) | Cisplatin (4mg/kg, IP, 1/7)+ LY2606368 (16mg/kg, BID, 1/7) | **0.72** |

**Table S3: Primers sequence for *CHEK1 and GAPDH***

| **Gene** | **Sense** | **Antisense** | **Tm** |
| --- | --- | --- | --- |
| ***CHK1*** | ATA TGA AGC GTG CCG TAG ACT | TGC CTA TGT CTG GCT CTA TTC TG | 60°C |
| ***GAPDH*** | AGG GGA GAT TCA GTG TGG TG | GGC CTC CAA GGA GTA AGA CC | 63°C |
